# Supplementary material for: Rapid evolution of regulatory element libraries for tunable transcriptional and translational control of gene expression
Source: PubMed Central journal article supplement — Synth Syst Biotechnol. 2017 Oct 19;2(4):295–301. doi: 10.1016/j.synbio.2017.10.003 (PMC5851936; doi:10.1016/j.synbio.2017.10.003), 2017-10-19
Supplement: mmc1.pdf [file mmc1.pdf]

## Supplementary

**Table S1. Strains and plasmids used in this study.**

| Plasmid or strain            | Relevant properties or genotype                                                                                                                            | Source              |
|------------------------------|------------------------------------------------------------------------------------------------------------------------------------------------------------|---------------------|
| <b>Plasmids</b>              |                                                                                                                                                            |                     |
| pETM6-eGFP                   | pETM6 vector carrying reporter gene eGFP, vector is used to carry the T7 promoter library, 5'UTR library, T7 terminator library and the cis-repressing RNA | [1]                 |
| pCDM4                        | Vector backbone used to carry the trans-activating RNA library                                                                                             | [1]                 |
| <b>Strains</b>               |                                                                                                                                                            |                     |
| <i>E. coli</i> NEB5 $\alpha$ | <i>fhuA2</i> $\Delta$ ( <i>argF-lacZ</i> ) <i>U169 phoA glnV44</i> $\Phi$ 80 $\Delta$ ( <i>lacZ</i> ) <i>M15 gyrA96 recA1 relA1 endA1 thi-1 hsdR17</i>     | New England Biolabs |
| <i>E. coli</i> BL21*(DE3)    | <i>F ompT hsdS<sub>B</sub> (r<sub>B</sub>, m<sub>B</sub>) galdcmrne131 (DE3)</i>                                                                           | Invitrogen          |

**Table S2. Primers and synthetic oligoes used in this study**

| No | Primer     | Nucleotide sequence (5' >3')                                                                                                  |
|----|------------|-------------------------------------------------------------------------------------------------------------------------------|
| 1  | T7lacO_F   | <b>ATACNNCTCACTATAGGAAT</b> NGTNNNCGGNNNACNATTC <b>CTAGA</b> AATAATTTGTTA                                                     |
| 2  | T7lacO_R   | <b>ATTCCTATAGTGAGNNGTAT</b> TAAATTTNNGATCNNNNNAT <b>CCTAGG</b> CTACGCCGACGCA                                                  |
| 3  | Rbslib_F   | <b>TTCACACAGGAAACCGAGGAGTC</b> TNNNNNGAGANNNNNA <b>CATATG</b> GTGAGCAAGGGCGAG                                                 |
| 4  | Rbslib_R   | <b>GACTCCTCGGTTTCTGTGTGAA</b> ANNNNNCTNNGNNT <b>TCTAGA</b> GGGAATTGTTATCC                                                     |
| 5  | T7ter_F    | <b>CTTGGGGCCTCTAAACGGGT</b> CTNNNNGGTTNNNT <b>GCTAGC</b> GAAAGGAGGAGTCGACTAT                                                  |
| 6  | T7ter_R    | <b>ACCCGTTTAGAGGCCCAAG</b> GGGNNNTGCNNNNTG <b>ACTAGT</b> AGACGAGTCCATGTGCTGG                                                  |
| 7  | cisRNA1_F  | <b>agcggataacaattcccctctaga</b> AAttGAtAttGtGAttAtGtGAagAttACTACAAGAACAGAGGAGAtAggCACAtat <b>gtgag</b><br><b>caaggcgaggag</b> |
| 8  | cisRNA1_R  | ctcctgccttgctcaccataTGTGccTaTCTCCTCTGTTCTGTAGTaaTctTCaCaTaaTCaCaaTaTCaaTTtctagagggaatt<br>ggtatccgct                          |
| 9  | TranAlib_R | <b>ctgtatgtcaaatgacacacata</b> aNNNNNacataNNNNNa <b>ctagaccctatagtgagt</b>                                                    |
| 10 | TranAlib_F | <b>tatgtgtgcatttgacatacag</b> tggNNNNNtccNNNNgt <b>ggtagctcagctcacta</b>                                                      |

## Supplementary Figures

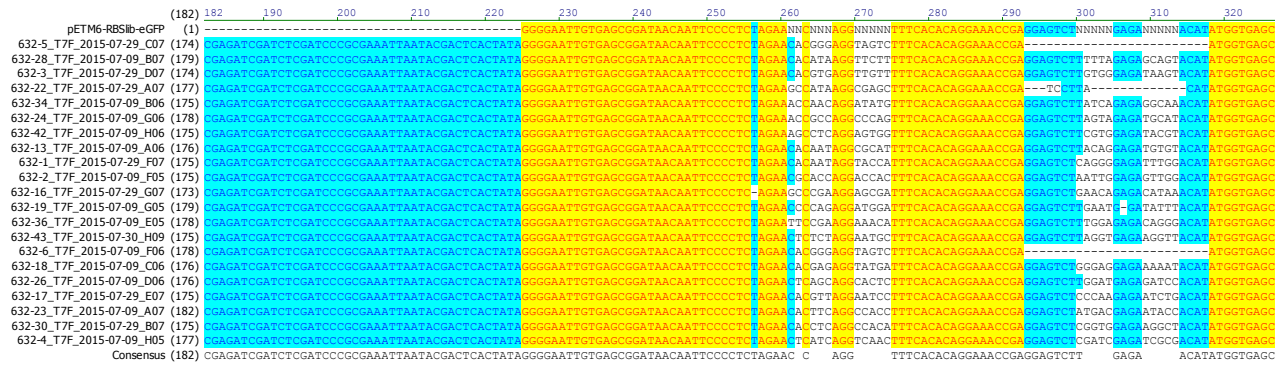

**Figure S1.** Representative sequencing results for 5'UTR library constructed in this study.

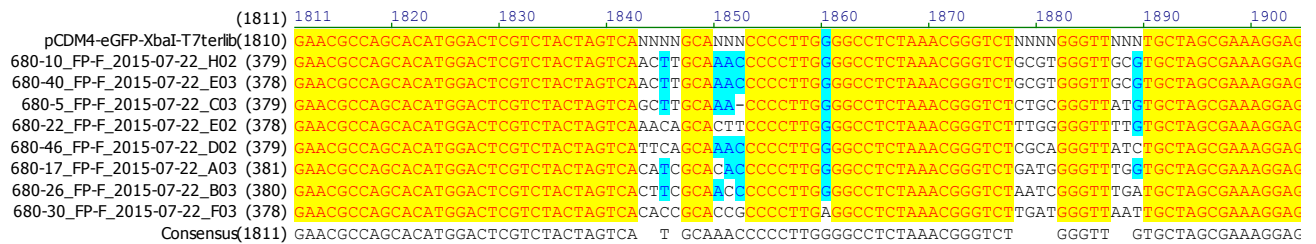

**Figure S2.** Representative sequencing results for T7 terminator library constructed in this study.

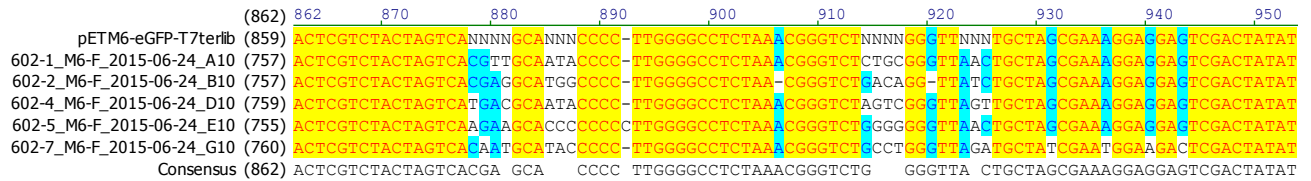

**Figure S3.** Representative sequencing results for T7 terminator library constructed in this study.

|                        |       |                             |        |                             |                             |       |         |               |      |      |      |
|------------------------|-------|-----------------------------|--------|-----------------------------|-----------------------------|-------|---------|---------------|------|------|------|
|                        | (951) | 951                         | 960    | 970                         | 980                         | 990   | 1000    | 1010          | 1020 | 1030 | 1040 |
| pCDM4-transA1-XbaI     | (951) | TAATACGACTCACTATAGGGGCTAGAT | GTGAT  | TATGTGAAGA                  | TTATGTGTGTCATTTGACATACAGTGG | CATAG | TCCGTAT | GTGGTACCC     |      |      |      |
| 572a_T7_2015-04-14_A04 | (199) | TAATACGACTCACTATAGGGGCTAGAT | TCCAG  | TATGTAAGAG                  | TTATGTGTGTCATTTGACATACAGTGG | TTAAG | TCCAAAT | GTGGTACCC     |      |      |      |
| 572c_T7_2015-04-14_C04 | (200) | TAATACGACTCACTATAGGGGCTAGAT | TTTC   | TATGTTGAAAT                 | TTATGTGTGTCATTTGACATACAGTGG | CTATA | TCC     | TGGTGGTACCC   |      |      |      |
| 572d_T7_2015-04-14_D04 | (199) | TAATACGACTCACTATAGGGGCTAGAT | AATGG  | TATGTTTTGA                  | TTATGTGTGTCATTTGACATACAGTGG | TAAAG | TCCAAAT | GTGGTACCC     |      |      |      |
| 573a_T7_2015-04-14_E04 | (199) | TAATACGACTCACTATAGGGGCTAGAT | TGGCA  | TATGTGATAG                  | TTATGTGTGTCATTTGACATACAGTGG | GGGT  | TCC     | TAGGGTGGTACCC |      |      |      |
| 573c_T7_2015-04-14_G04 | (200) | TAATACGACTCACTATAGGGGCTAGAT | GAAC   | TATGTACCCC                  | TTATGTGTGTCATTTGACATACAGTGG | TGTT  | TCC     | AAAGTGGTACCC  |      |      |      |
| 573d_T7_2015-04-14_H04 | (200) | TAATACGACTCACTATAGGGGCTAGAT | CGCA   | TATGTCCTCAG                 | TTATGTGTGTCATTTGACATACAGTGG | GGG   | TCC     | AAATGTGGTACCC |      |      |      |
| 572b_T7_2015-04-14_B04 | (200) | TAATACGACTCACTATAGGGGCTAGAT | GCAT   | TATGTTAACG                  | TTATGTGTGTCATTTGACATACAGTGG | TAGAG | TCC     | AAATGTGGTACCC |      |      |      |
| 573b_T7_2015-04-14_F04 | (201) | TAATACGACTCACTATAGGGGCTAGAT | CGGT   | TATGTCGATA                  | TTATGTGTGTCATTTGACATACAGTGG | AACCT | TCC     | AAATGTGGTACCC |      |      |      |
| Consensus              | (951) | TAATACGACTCACTATAGGGGCTAGAT | CTATGT | TTATGTGTGTCATTTGACATACAGTGG |                             |       | GTCCAAT | GTGGTACCC     |      |      |      |

**Figure S4.** Representative sequencing results for trans-activating RNA library No 1-8 constructed in this study.

|                           |       |                                      |        |         |                                    |        |             |             |      |      |      |
|---------------------------|-------|--------------------------------------|--------|---------|------------------------------------|--------|-------------|-------------|------|------|------|
|                           | (942) | 942                                  | 950    | 960     | 970                                | 980    | 990         | 1000        | 1010 | 1020 | 1030 |
| pCDM4-transA1-XbaI        | (942) | CCGCGAAATTAATACGACTCACTATAGGGGCTAGAT | GTGAT  | TATGTGA | GATTATGTGTGTCATTTGACATACAGTGG      | CATAG  | TCCGTAT     | GTGGTAC     |      |      |      |
| TAlib21_T7_2015-04-17_E01 | (193) | CCGCGAAATTAATACGACTCACTATAGGGGCTAGAT | ATCCAT | TATGCTT | GATTATGTGTGTCATTTGACATACAGTGG      | CGACT  | TCC         | AAATGTGGTAC |      |      |      |
| TAlib10_T7_2015-04-17_B01 | (192) | CCGCGAAATTAATACGACTCACTATAGGGGCTAGAT | AGACA  | TATGTC  | ATTATGTGTGTCATTTGACATACAGTGG       | AGGAA  | TCC         | AAATGTGGTAC |      |      |      |
| TAlib11_T7_2015-04-17_C01 | (194) | CCGCGAAATTAATACGACTCACTATAGGGGCTAGAT | ACAGC  | TATGTAC | TTTATGTGTGTCATTTGACATACAGTGG       | CCGTC  | TCC         | AAAGTGGTAC  |      |      |      |
| TAlib13_T7_2015-04-17_E01 | (193) | CCGCGAAATTAATACGACTCACTATAGGGGCTAGAT | CAACG  | TAT     | TGAATTTATGTGTGTCATTTGACATACAGTGG   | TTT    | TCC         | AAATGTGGTAC |      |      |      |
| TAlib22_T7_2015-04-17_F02 | (196) | CCGCGAAATTAATACGACTCACTATAGGGGCTAGAT | TCATT  | TATG    | GGCGCTTATGTGTGTCATTTGACATACAGTGG   | TTCTC  | TCC         | AAATGTGGTAC |      |      |      |
| TAlib12_T7_2015-04-17_D01 | (193) | CCGCGAAATTAATACGACTCACTATAGGGGCTAGAT | CAGCA  | TATG    | CGTATGTGTGTCATTTGACATACAGTGG       | AGATC  | TCC         | AAATGTGGTAC |      |      |      |
| TAlib16_T7_2015-04-17_H01 | (192) | CCGCGAAATTAATACGACTCACTATAGGGGCTAGAT | CACGA  | TATG    | TCCCGCTTATGTGTGTCATTTGACATACAGTGG  | GGCTA  | TCC         | AAATGTGGTAC |      |      |      |
| TAlib18_T7_2015-04-17_B02 | (191) | CCGCGAAATTAATACGACTCACTATAGGGGCTAGAT | GCTGT  | TATG    | TCCCTTATGTGTGTCATTTGACATACAGTGG    | GTCTG  | TCC         | AAAGTGGTAC  |      |      |      |
| TAlib19_T7_2015-04-17_C02 | (192) | CCGCGAAATTAATACGACTCACTATAGGGGCTAGAT | GAGGC  | TATG    | TCCGATTTATGTGTGTCATTTGACATACAGTGG  | TGTCAG | TCC         | AAATGTGGTAC |      |      |      |
| TAlib23_T7_2015-04-17_G02 | (193) | CCGCGAAATTAATACGACTCACTATAGGGGCTAGAT | CGCCT  | TATG    | TAAAGCCTTATGTGTGTCATTTGACATACAGTGG | ACAAA  | TCC         | AAAGTGGTAC  |      |      |      |
| TAlib15_T7_2015-04-17_G01 | (194) | CCGCGAAATTAATACGACTCACTATAGGGGCTAGAT | CTAAC  | TATG    | TCCAGTTATGTGTGTCATTTGACATACAGTGG   | AATA   | TCC         | AAATGTGGTAC |      |      |      |
| TAlib20_T7_2015-04-17_D02 | (194) | CCGCGAAATTAATACGACTCACTATAGGGGCTAGAT | GAAAA  | TATG    | TATAATTTATGTGTGTCATTTGACATACAGTGG  | GGTGT  | TCC         | AAATGTGGTAC |      |      |      |
| Consensus                 | (942) | CCGCGAAATTAATACGACTCACTATAGGGGCTAGAT | TATGT  | A       | TTATGTGTGTCATTTGACATACAGTGG        | TCC    | AAATGTGGTAC |             |      |      |      |

**Figure S5.** Representative sequencing results for trans-activating RNA library No 9-23 constructed in this study.

|                           |       |                           |       |        |                             |                             |             |         |           |           |        |
|---------------------------|-------|---------------------------|-------|--------|-----------------------------|-----------------------------|-------------|---------|-----------|-----------|--------|
|                           | (954) | 954                       | 960   | 970    | 980                         | 990                         | 1000        | 1010    | 1020      | 1030      | 1040   |
| pCDM4-transA1-XbaI        | (953) | ATACGACTCACTATAGGGGCTAGAT | GTG   | TATGT  | GAAAGA                      | TTATGTGTGTCATTTGACATACAGTGG | CATAG       | TCCGTAT | GTGGTACCC | TCGAGT    |        |
| TAlib30_T7_2015-04-19_G08 | (203) | ATACGACTCACTATAGGGGCTAGAT | CG    | TATGT  | TATATT                      | TTATGTGTGTCATTTGACATACAGTGG | TCTCT       | TCC     | CAAG      | GTGGTACCC | TCGAGT |
| TAlib33_T7_2015-04-19_E02 | (204) | ATACGACTCACTATAGGGGCTAGAT | CTACC | TATGT  | GTTTT                       | TTATGTGTGTCATTTGACATACAGTGG | TCGAT       | TCC     | CGGG      | GTGGTACCC | TCGAGT |
| TAlib32_T7_2015-04-19_A09 | (205) | ATACGACTCACTATAGGGGCTAGAT | CAGGG | TATGT  | GTTC                        | TTATGTGTGTCATTTGACATACAGTGG | TTTTT       | TCC     | TTGT      | GTGGTACCC | TCGAGT |
| TAlib29_T7_2015-04-19_F08 | (206) | ATACGACTCACTATAGGGGCTAGAT | AA    | TTATGT | GCAAC                       | TTATGTGTGTCATTTGACATACAGTGG | TTTG        | TCC     | CCTT      | GTGGTACCC | TCGAGT |
| TAlib24_T7_2015-04-19_A08 | (207) | ATACGACTCACTATAGGGGCTAGAT | GGT   | TATGT  | CAGAT                       | TTATGTGTGTCATTTGACATACAGTGG | TGCG        | TCC     | TCTC      | GTGGTACCC | TCGAGT |
| TAlib38_T7_2015-04-19_G09 | (205) | ATACGACTCACTATAGGGGCTAGAT | GT    | TATGT  | TAAAC                       | TTATGTGTGTCATTTGACATACAGTGG | TACCG       | TCC     | CGGG      | GTGGTACCC | TCGAGT |
| TAlib35_T7_2015-04-19_D09 | (204) | ATACGACTCACTATAGGGGCTAGAT | TGT   | TATGT  | TCTCA                       | TTATGTGTGTCATTTGACATACAGTGG | GCCCA       | TCC     | AAAT      | GTGGTACCC | TCGAGT |
| TAlib37_T7_2015-04-19_F09 | (202) | ATACGACTCACTATAGGGGCTAGAT | TAT   | TATGT  | TCTCC                       | TTATGTGTGTCATTTGACATACAGTGG | GGG         | TCC     | ATCC      | GTGGTACCC | TCGAGT |
| TAlib26_T7_2015-04-19_C08 | (205) | ATACGACTCACTATAGGGGCTAGAT | GAC   | TATGT  | TATAA                       | TTATGTGTGTCATTTGACATACAGTGG | GACAA       | TCC     | TGCA      | GTGGTACCC | TCGAGT |
| TAlib34_T7_2015-04-19_C09 | (203) | ATACGACTCACTATAGGGGCTAGAT | GAT   | TATGT  | TAAAGA                      | TTATGTGTGTCATTTGACATACAGTGG | GATTC       | TCC     | TGTA      | GTGGTACCC | TCGAGT |
| TAlib25_T7_2015-04-19_B08 | (208) | ATACGACTCACTATAGGGGCTAGAT | AAAGG | TATGT  | TCCGT                       | TTATGTGTGTCATTTGACATACAGTGG | GATTC       | TCC     | TGAA      | GTGGTACCC | TCGAGT |
| TAlib28_T7_2015-04-19_E08 | (207) | ATACGACTCACTATAGGGGCTAGAT | CC    | TATGT  | CAGCC                       | TTATGTGTGTCATTTGACATACAGTGG | TAGT        | TCC     | GAAG      | GTGGTACCC | TCGAGT |
| TAlib36_T7_2015-04-19_E09 | (206) | ATACGACTCACTATAGGGGCTAGAT | CAAGT | TATGT  | TTCCC                       | TTATGTGTGTCATTTGACATACAGTGG | CAGGC       | TCC     | CGTG      | GTGGTACCC | TCGAGT |
| TAlib31_T7_2015-04-19_H08 | (207) | ATACGACTCACTATAGGGGCTAGAT | ACAG  | TATGT  | TAAAGT                      | TTATGTGTGTCATTTGACATACAGTGG | GAGAT       | TCC     | GGCC      | GTGGTACCC | TCGAGT |
| TAlib27_T7_2015-04-19_D08 | (207) | ATACGACTCACTATAGGGGCTAGAT | CA    | TATGT  | GGTTG                       | TTATGTGTGTCATTTGACATACAGTGG | CCATG       | TCC     | TTGT      | GTGGTACCC | TCGAGT |
| TAlib39_T7_2015-04-19_H09 | (203) | ATACGACTCACTATAGGGGCTAGAT | AGAGT | TATGT  | TCCGG                       | TTATGTGTGTCATTTGACATACAGTGG | CCATG       | TCC     | GTTT      | GTGGTACCC | TCGAGT |
| Consensus                 | (954) | ATACGACTCACTATAGGGGCTAGAT | TA    | TATGT  | TTATGTGTGTCATTTGACATACAGTGG | TCC                         | AAATGTGGTAC |         |           |           |        |

**Figure S6.** Representative sequencing results for trans-activating RNA library No 24-39 constructed in this study.

|                                 | (946)                            | 946   | 960   | 970   | 980             | 990            | 1000  | 1010     | 1020             | 1030 | 1040 |
|---------------------------------|----------------------------------|-------|-------|-------|-----------------|----------------|-------|----------|------------------|------|------|
| pCDM4-transA1 (946)             | GAAATTAATACGACTCACTATAGGGGCTAGAT | GTGAT | TATGT | GAAGA | TTATGTGTGTCATT  | GACATACAGTGG   | CATAG | TCCGTAT  | GTGGTACCCCTCGAGT |      |      |
| TAlib43_T7_2015-04-21_D10 (197) | GAAATTAATACGACTCACTATAGGGGCTAGAT | ACTAG | TATGT | CACAA | TTATGTGTGTCATT  | GACATACAGTGG   | TCCAT | TCCCTCC  | GTGGTACCCCTCGAGT |      |      |
| TAlib47_T7_2015-04-21_H10 (193) | GAAATTAATACGACTCACTATAGGGGCTAGAT | GTAT  | TATGT | GACAG | TTATGTGTGTCATT  | GACATACAGTGG   | GGCT  | TCCAACCC | GTGGTACCCCTCGAGT |      |      |
| TAlib40_T7_2015-04-21_A10 (196) | GAAATTAATACGACTCACTATAGGGGCTAGAT | AAAGC | TATGT | ACAT  | TTATGTGTGTCATT  | GACATACAGTGG   | CCTA  | TCCGAAT  | GTGGTACCCCTCGAGT |      |      |
| TAlib41_T7_2015-04-21_B10 (195) | GAAATTAATACGACTCACTATAGGGGCTAGAT | TGAGA | TATGT | ACCG  | TTATGTGTGTCATT  | GACATACAGTGG   | TTGA  | TCCGCTC  | GTGGTACCCCTCGAGT |      |      |
| TAlib42_T7_2015-04-21_C10 (195) | GAAATTAATACGACTCACTATAGGGGCTAGAT | TGAC  | TATGT | TCT   | TTATGTGTGTCATT  | GACATACAGTGG   | TAGA  | TCCGGGA  | GTGGTACCCCTCGAGT |      |      |
| TAlib44_T7_2015-04-21_E10 (195) | GAAATTAATACGACTCACTATAGGGGCTAGAT | ACCC  | TATGT | TATG  | TTATGTGTGTCATT  | GACATACAGTGG   | AGCG  | TCCGTCAG | GTGGTACCCCTCGAGT |      |      |
| TAlib45_T7_2015-04-21_F10 (195) | GAAATTAATACGACTCACTATAGGGGCTAGAT | CAC   | TATGT | GAC   | TTATGTGTGTCATT  | GACATACAGTGG   | ACAG  | TCCATAG  | GTGGTACCCCTCGAGT |      |      |
| TAlib46_T7_2015-04-21_G10 (195) | GAAATTAATACGACTCACTATAGGGGCTAGAT | CGAGA | TATGT | CATAA | TTATGTGTGTCATT  | GACATACAGTGG   | TGAT  | TCCGTGT  | GTGGTACCCCTCGAGT |      |      |
| Consensus (946)                 | GAAATTAATACGACTCACTATAGGGGCTAGAT | CA    | TATGT | C     | TTTATGTGTGTCATT | TGACATACAGTGGT | TCC   |          | GTGGTACCCCTCGAGT |      |      |

**Figure S7.** Representative sequencing results for trans-activating RNA library No 40-47 constructed in this study.

## References

1. Xu, P., et al., *ePathBrick: A Synthetic Biology Platform for Engineering Metabolic Pathways in E. coli*. ACS Synth. Biol., 2012. 1(7): p. 256-266.
